# Supplementary material
Source: ML conference proceedings conference paper supplement (https://openaccess.thecvf.com/content/CVPR2026/html/Chavan_S2D_Selective_Spectral_CVPR_2026_paper.html)
Supplement: Supplementary file 1 [file Chavan_S2D_Selective_Spectral_CVPR_2026_supplemental.pdf]

## Appendix

### A. Theoretical Analysis: Spectral Bounds

In this section, we provide the formal proof for Theorem 1 stated in the main text and expand upon the connection between spectral norms and the propagation of activation outliers in deep networks.

#### A.1. Proof of Activation Magnitude Bound

We first restate the bound regarding the relationship between the spectral norm of a weight matrix and the magnitude of the output activations.

**Theorem 1 (Restated).** *Let  $\mathbf{y} = \mathbf{W}\mathbf{x}$  be the output of a linear layer for an input vector  $\mathbf{x} \in \mathbb{R}^n$  and weight matrix  $\mathbf{W} \in \mathbb{R}^{m \times n}$ . The Euclidean norm of the output vector is bounded by the spectral norm of the weight matrix  $\sigma_{\max}(\mathbf{W})$ , such that:*

$$\|\mathbf{y}\|_2 \leq \sigma_{\max}(\mathbf{W}) \cdot \|\mathbf{x}\|_2 \quad (7)$$

*Proof.* Let  $\|\cdot\|_2$  denote the Euclidean norm on vectors. The matrix norm induced by the vector Euclidean norm (the spectral norm) is defined as:

$$\|\mathbf{W}\|_2 := \sup_{\mathbf{x} \neq \mathbf{0}} \frac{\|\mathbf{W}\mathbf{x}\|_2}{\|\mathbf{x}\|_2} = \sigma_{\max}(\mathbf{W}) \quad (8)$$

where  $\sigma_{\max}(\mathbf{W})$  is the largest singular value of  $\mathbf{W}$ . By the definition of the supremum, for any specific  $\mathbf{x} \in \mathbb{R}^n$ , it must hold that:

$$\frac{\|\mathbf{W}\mathbf{x}\|_2}{\|\mathbf{x}\|_2} \leq \sigma_{\max}(\mathbf{W}) \quad (9)$$

Multiplying both sides by  $\|\mathbf{x}\|_2$  (assuming  $\mathbf{x} \neq \mathbf{0}$ ; the trivial case holds for  $\mathbf{x} = \mathbf{0}$ ) yields:

$$\|\mathbf{y}\|_2 = \|\mathbf{W}\mathbf{x}\|_2 \leq \sigma_{\max}(\mathbf{W})\|\mathbf{x}\|_2 \quad (10)$$

□

This result establishes that a large spectral norm is a necessary condition for a linear layer to amplify a reasonably scaled input into a large-magnitude output outlier.

### B. Algorithm

Algorithm 1 presents the complete training procedure for Selective Spectral Decay (S<sup>2</sup>D). The algorithm operates by periodically computing singular value decompositions and selectively penalizing dominant spectral components responsible for activation outliers.

#### Key steps:

1. **Periodic SVD updates (Lines 6–17):** Every  $k$  training steps, the algorithm computes the SVD of each layer’s weight matrix  $\mathbf{W}^{(l)} = \mathbf{U}\Sigma\mathbf{V}^\top$ , identifying the spectral structure of the weights.

2. **Outlier detection (Line 9):** Using the Principal Component Dominance Ratio (PCDR), the algorithm identifies the minimum rank  $k$  where  $\text{PCDR} \geq \tau$ . This determines how many dominant singular values are responsible for creating outliers.
3. **Penalty matrix construction (Lines 11–12):** For layers with identified outliers, a penalty matrix  $\mathbf{G}_{\text{reg}}$  is constructed by raising the top- $k$  singular values to power  $n$  and reconstructing the partial matrix. This targets only the problematic spectral components.
4. **Gradient update (Lines 18–21):** During each training step, the standard task gradient is augmented with the cached penalty  $\lambda\mathbf{G}_{\text{reg}}$ , applying selective regularization pressure to the weight components aligned with the largest singular values while leaving other components largely unaffected.

### C. Analysis of Outlier Origins

In this section, we expand upon the connection between adaptive optimizers and the formation of activation outliers in transformer models. While the dominant singular *directions* ( $U, V$ ) encode semantically meaningful representations, their *extreme magnitudes* ( $\Sigma$ ) are predominantly optimization artifacts rather than functionally necessary features.

**Evidence from Prior Work.** Several independent lines of evidence support this characterization. [2] show that Adam-trained models exhibit rapid growth in excess kurtosis ( $> 100$ ), indicating the emergence of significant outlier channels, whereas SGD-trained models maintain substantially lower kurtosis throughout training. [6] demonstrate that Adam’s component-wise normalization privileges the training basis; when this basis is rotated to decorrelate the model, outliers disappear without performance loss, confirming they are not functionally necessary. Furthermore, [7] link outlier features to large diagonal adaptive learning rates in Adam, showing that reducing adaptivity minimizes outlier formation.

**Implications for S<sup>2</sup>D.** These findings establish that outlier magnitudes are preventable artifacts of AdamW’s basis preference and anisotropic update dynamics. S<sup>2</sup>D acts as a targeted counter-force to this spectral amplification. The fact that S<sup>2</sup>D maintains or improves full-precision accuracy (e.g., +1.2% on LLaVA, Table 5 in the main text) confirms that suppressing these extreme magnitudes is benign to the model’s semantic capacity.

---

**Algorithm 1** Selective Spectral Decay (S<sup>2</sup>D)

---

```
1: Input: Weights  $\mathbf{W}$ 
2: Hyperparams: Power  $n$ , Reg. strength  $\lambda$ , Learning rate  $\eta$ , Update frequency  $k$ , PCDR threshold  $\tau$ 
3: Initialize step counter  $t \leftarrow 0$ 
4: Initialize penalty matrices  $\mathbf{G}_{\text{reg}}^{(l)} \leftarrow \mathbf{0}$  for all layers  $l$ 
5: while training do
6:   if  $t \bmod k = 0$  then ▷ Periodic spectral update
7:     for layer  $l = 1$  to  $L$  do
8:        $\mathbf{U}, \mathbf{\Sigma}, \mathbf{V} \leftarrow \text{SVD}(\mathbf{W}^{(l)})$ 
9:        $\hat{k} \leftarrow \min\{k' : \text{PCDR}(\mathbf{\Sigma}, k') \geq \tau\}$  ▷ Identify outlier rank cutoff
10:      if  $\hat{k}$  is defined then
11:         $\mathbf{\Sigma}_n \leftarrow \text{diag}(\sigma_1^n, \dots, \sigma_{\hat{k}}^n)$ 
12:         $\mathbf{G}_{\text{reg}}^{(l)} \leftarrow \mathbf{U}_{:,1:\hat{k}} \mathbf{\Sigma}_n (\mathbf{V}_{:,1:\hat{k}})^\top$  ▷ Cache penalty matrix
13:      else
14:         $\mathbf{G}_{\text{reg}}^{(l)} \leftarrow \mathbf{0}$  ▷ No significant outlier rank found
15:      end if
16:    end for
17:  end if
18:   $\nabla_{\mathbf{W}} \mathcal{L}_{\text{task}} \leftarrow \text{Backward}(\mathcal{L}_{\text{task}}(\text{batch}))$  ▷ Standard task loss gradient
19:  for layer  $l = 1$  to  $L$  do ▷ Apply regularized update
20:     $\mathbf{W}^{(l)} \leftarrow \mathbf{W}^{(l)} - \eta \left( \nabla_{\mathbf{W}^{(l)}} \mathcal{L}_{\text{task}} + \lambda \mathbf{G}_{\text{reg}}^{(l)} \right)$ 
21:  end for
22:   $t \leftarrow t + 1$ 
23: end while
```

---

## D. Comparison with Alternative Regularization Approaches

**S<sup>2</sup>D vs. Rotation Methods (SpinQuant, QuIP).** Rotation-based methods mitigate outliers by *redistributing* activation magnitudes through a learned or analytically computed basis transformation  $W' = RW$ . In contrast, S<sup>2</sup>D *suppresses* the spectral cause directly by penalizing the dominant singular values in  $\Sigma$ . These two strategies are thus orthogonal and potentially complementary. Additionally, S<sup>2</sup>D avoids the online inference overhead of rotation methods, producing standard weights compatible with vanilla deployment kernels.

**S<sup>2</sup>D vs. Standard Spectral Regularization.** Standard spectral regularization applies uniform pressure to every singular component across the network. As shown in Table 6, applying spectral regularization without the PCDR diagnostic collapses W4A4 accuracy to 40.1% on ImageNet (SigLIP2-Base-384). PCDR acts as a surgical guide, targeting only the spectral components identified to cause pathological activation concentration. Without this selectivity, regularization indiscriminately suppresses both harmful and beneficial spectral components, degrading model capacity.

Table 6. **Impact of PCDR-guided layer selection.** Comparison of S<sup>2</sup>D with and without PCDR targeting on ImageNet classification using ERQ quantization (SigLIP2-Base-384). Without PCDR, uniform spectral regularization severely degrades low-bit performance.

|      | No PCDR | S <sup>2</sup> D |
|------|---------|------------------|
| W4A4 | 40.1    | <b>73.0</b>      |
| W5A5 | 77.1    | <b>81.9</b>      |
| W6A6 | 81.2    | <b>82.7</b>      |

## E. Self-Supervised Backbone

We extend our experiments to DINOv3 [22], a recently trained self-supervised vision backbone. We attempted to quantize DINOv3 using the official ERQ codebase [35]; however, all ERQ configurations yielded near-random accuracy regardless of bit-width, suggesting an incompatibility with the self-supervised feature distribution. We therefore report results exclusively with PTQ4ViT [33] in Table 8. We also present spectral statistics for DINOv3 in Table 7. Both the PTQ results and spectral patterns are consistent with the SigLIP2 findings, confirming that S<sup>2</sup>D improves quantization of modern self-supervised models.

Table 7. **Comparison of FFN activation and weight statistics for SigLIP2 and DINOv3.** We report the  $\text{PCDR}_1$  and maximum absolute activation of the FFN layers, along with the maximum singular value of their corresponding weights, after fine-tuning with AdamW and AdamW+S<sup>2</sup>D.

| Model   | Layer   | $\text{PCDR}_1$ |                  | Max Abs. Activation |                  | Max Singular Value |                  |
|---------|---------|-----------------|------------------|---------------------|------------------|--------------------|------------------|
|         |         | AdamW           | S <sup>2</sup> D | AdamW               | S <sup>2</sup> D | AdamW              | S <sup>2</sup> D |
| SigLIP2 | Layer 5 | 0.91            | 0.46             | 176.40              | 59.68            | 10.38              | 3.22             |
|         | Layer 9 | 0.77            | 0.09             | 1166.2              | 614.7            | 7.87               | 3.96             |
| DINOv3  | Layer 2 | 0.47            | 0.11             | 1048.41             | 440.38           | 37.29              | 17.94            |
|         | Layer 4 | 0.45            | 0.22             | 115.55              | 67.56            | 8.67               | 3.79             |

Table 8. **PTQ4ViT quantization results on DINOv3-Base** with and without S<sup>2</sup>D regularization. ImageNet top-1 accuracy (%) is reported.

| Method                   | W8A8         | W6A6         | W5A5         |
|--------------------------|--------------|--------------|--------------|
| AdamW                    | 58.03        | <b>57.04</b> | 28.52        |
| AdamW + S <sup>2</sup> D | <b>76.53</b> | 56.10        | <b>30.69</b> |

## F. Extension to Language Models

To evaluate the generality of S<sup>2</sup>D beyond vision and vision-language tasks, we conduct a preliminary experiment on a pure language model. We fine-tune Qwen2.5-0.5B using supervised fine-tuning (SFT) on the Dolci dataset, applying S<sup>2</sup>D with the same hyperparameters used in the vision experiments (no task-specific tuning). We then evaluate on GSM8K (0-shot) under round-to-nearest (RTN) quantization at various bit-widths. Results are presented in Table 9.

Despite using fewer than 1B training tokens and no hyperparameter adaptation for the language domain, S<sup>2</sup>D consistently improves quantized performance across W8A8, W7A7, and W6A6 settings, with gains of +2.2, +2.6, and +2.0 percentage points respectively. The slight reduction in full-precision performance (−1.0) reflects the regularization trade-off, which is more than compensated by the quantization gains. We expect that a learning rate sweep and longer training schedule would further improve both full-precision and quantized results.

## G. Hyperparameter Sensitivity

We analyze the robustness of S<sup>2</sup>D by varying its key hyperparameters. As shown in Table 10, the default configuration ( $k=100$ ,  $\text{topk}=3$ ,  $\text{threshold}=0.95$ ) yields the highest W4A4 performance at 73.0%.

We observe that a larger update interval ( $k=100$ ) outperforms frequent updates ( $k=10$ ), suggesting that accumulating statistics over a longer horizon improves stability. Interestingly, increasing  $\text{topk}$  from 3 to 10 results in a marginal

Table 9. **GSM8K 0-shot results with RTN quantization for Qwen2.5-0.5B.** S<sup>2</sup>D improves quantized accuracy across all tested bit-widths using the same hyperparameters from the vision experiments.

|      | S <sup>2</sup> D | Baseline |
|------|------------------|----------|
| FP   | 28.2             | 29.2     |
| W8A8 | <b>26.2</b>      | 24.0     |
| W7A7 | <b>24.7</b>      | 22.1     |
| W6A6 | <b>19.8</b>      | 17.8     |

Table 10. **Hyperparameter sensitivity analysis for S<sup>2</sup>D on ImageNet.** We vary the SVD computation frequency ( $k$ ), number of targeted singular values ( $\text{topk}$ ), and  $\text{PCDR}$  threshold. The **default** configuration is shown in bold.

| $k$                                                              | $\text{topk}$ | $\tau$      | FP16 (%)    | W4A4 (%)    |
|------------------------------------------------------------------|---------------|-------------|-------------|-------------|
| <i>Vary SVD update frequency <math>k</math></i>                  |               |             |             |             |
| 10                                                               | 3             | 0.95        | 85.0        | 72.2        |
| <b>100</b>                                                       | <b>3</b>      | <b>0.95</b> | <b>85.0</b> | <b>73.0</b> |
| <i>Vary number of targeted singular values</i>                   |               |             |             |             |
| 100                                                              | 5             | 0.95        | 85.0        | 72.5        |
| 100                                                              | 10            | 0.95        | 84.9        | 72.6        |
| <i>Vary <math>\text{PCDR}</math> threshold <math>\tau</math></i> |               |             |             |             |
| 100                                                              | 3             | 0.90        | 84.9        | 72.4        |
| 100                                                              | 3             | 0.80        | 84.8        | 72.8        |

performance drop, indicating that outlier mitigation is most effective when targeting only the few most dominant singular directions. Finally, a stricter  $\text{PCDR}$  threshold of 0.95 proves optimal compared to lower values.

### G.1. Sensitivity to Power Exponent $n$

The power exponent  $n$  in S<sup>2</sup>D controls the degree of non-uniformity in the penalty applied to singular values: larger  $n$  concentrates regularization pressure more aggressively on

Table 11. **Sensitivity to power exponent  $n$ .** ImageNet accuracy (%) using ERQ quantization on SigLIP2-Base-384.  $n=2$  provides the best balance across bit-widths.

|      | Baseline | $n=2$       | $n=3$ | $n=4$ |
|------|----------|-------------|-------|-------|
| W4A4 | 65.6     | <b>73.0</b> | 68.3  | 69.6  |
| W5A5 | 78.5     | <b>81.9</b> | 79.0  | 78.7  |
| W6A6 | 81.1     | <b>82.7</b> | 81.7  | 82.4  |

the dominant singular values. We chose  $n=2$  (yielding a  $\sigma^3$  penalty) to exert stronger regularization on the singular values contributing to outliers while preserving smaller components. Table 11 confirms that while higher orders ( $n=3, 4$ ) still outperform the baseline,  $n=2$  offers the optimal trade-off between outlier suppression and capacity preservation.

## G.2. Amortized SVD Stability

A potential concern with the amortized SVD computation (every  $m=100$  steps) is whether the cached singular vectors ( $U, V$ ) become stale and lead to inaccurate gradient updates. To validate this design choice, we analyzed the stability of the S<sup>2</sup>D gradient penalty computed using cached versus freshly computed SVD factors. The cosine similarity between the two gradient signals remains above 0.99 over the  $m=100$  step caching interval, confirming that the singular vector subspaces evolve slowly relative to the caching frequency. This justifies the computational amortization and explains why  $k=100$  outperforms more frequent updates ( $k=10$ ) in Table 10: the additional noise from frequent re-computation slightly destabilizes training without meaningful accuracy benefit.
